# Supplementary material for: Trajectories of energy intake distribution and subsequent risk of hyperglycemia among Chinese adults: findings from the China Health and Nutrition Survey (1997–2018)
Source: Springer Nature journal article supplement (doi:10.1007/s00394-021-02745-3), 2021-11-27
Supplement: MOESM2 [file 19906568]

## Supplemental file 1

Submitted to **European Journal of Nutrition**

### **Trajectories of energy intake distribution and subsequent risk of hyperglycemia among Chinese adults: Findings from the China Health and Nutrition Survey (1997-2018)**

Xiaoyun Song, Huijun Wang, Chang Su, Zhihong Wang, Wenwen Du, Haojie Hu, Feifei Huang, Jiguo Zhang, Xiaofang Jia, Hongru Jiang, Yifei Ouyang, Li Li, Jing Bai, Xiaofan Zhang, Gangqiang Ding, and Bing Zhang \*

National Institute for Nutrition and Health, Chinese Center for Disease Control and Prevention, Beijing 100050, China; [sxydljk@126.com](mailto:sxydljk@126.com) (X.S.); [wanghj@ninh.chinacdc.cn](mailto:wanghj@ninh.chinacdc.cn) (H.W.); [suchang@ninh.chinacdc.cn](mailto:suchang@ninh.chinacdc.cn) (C.S.); [wangzh@ninh.chinacdc.cn](mailto:wangzh@ninh.chinacdc.cn) (Z.W.); [Duww@ninh.chinacdc.cn](mailto:Duww@ninh.chinacdc.cn) (W.D.); [15732683256@163.com](mailto:15732683256@163.com) (H.H.); [huangff@ninh.chinacdc.cn](mailto:huangff@ninh.chinacdc.cn) (F.H.); [zhangjg@ninh.chinacdc.cn](mailto:zhangjg@ninh.chinacdc.cn) (J.Z.); [jiaxf@ninh.chinacdc.cn](mailto:jiaxf@ninh.chinacdc.cn) (X.J.); [jianghr@ninh.chinacdc.cn](mailto:jianghr@ninh.chinacdc.cn) (H.J.); [ouyyf@ninh.chinacdc.cn](mailto:ouyyf@ninh.chinacdc.cn) (Y.O.); [lili@ninh.chinacdc.cn](mailto:lili@ninh.chinacdc.cn) (L.L.); [Baijing@ninh.chinacdc.cn](mailto:Baijing@ninh.chinacdc.cn) (J.B.); [Zhangxf@ninh.chinacdc.cn](mailto:Zhangxf@ninh.chinacdc.cn) (X.Z.); [dinggq@chinacdc.cn](mailto:dinggq@chinacdc.cn) (G.D.)

\* Correspondence: [zhangbing@chinacdc.cn](mailto:zhangbing@chinacdc.cn), Tel.: +86-10-6623-7008, Fax: +86-10-6771-1813

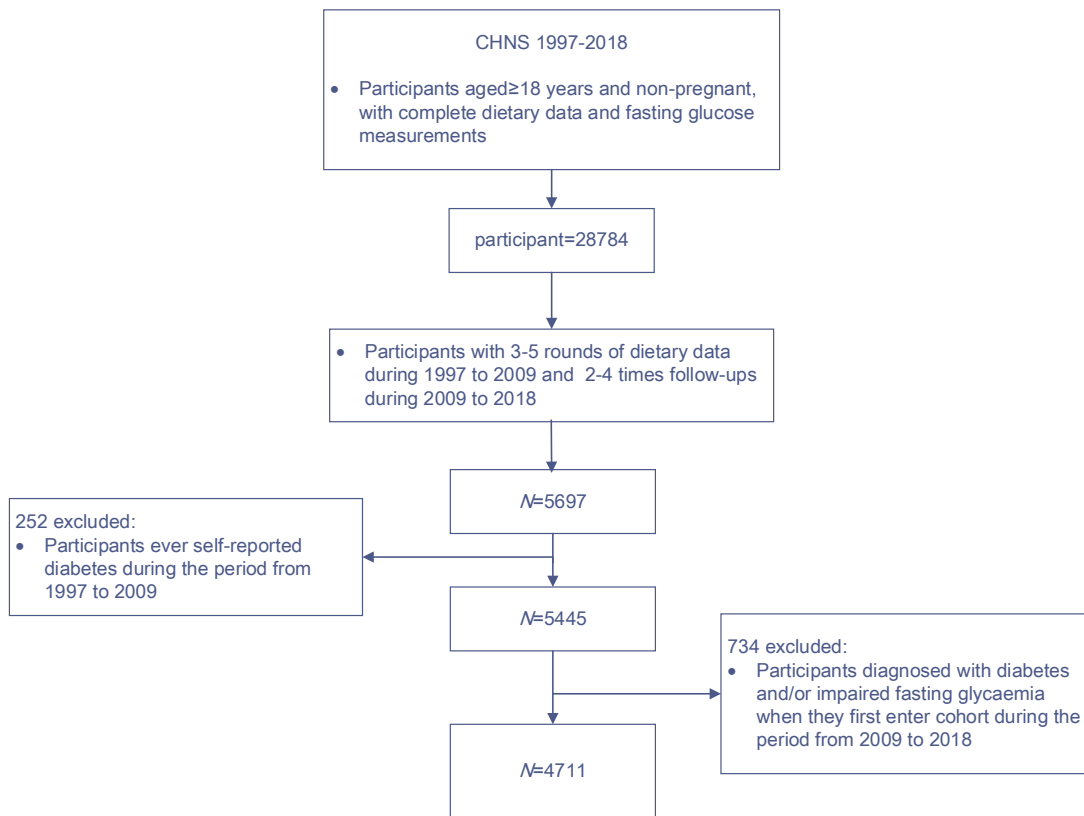

**Figure S1.** Flow chart of study population selection

## Supplemental file 2

Submitted to **European Journal of Nutrition**

### **Trajectories of energy intake distribution and subsequent risk of hyperglycemia among Chinese adults: Findings from the China Health and Nutrition Survey (1997-2018)**

Xiaoyun Song, Huijun Wang, Chang Su, Zhihong Wang, Wenwen Du, Haojie Hu, Feifei Huang, Jiguo Zhang, Xiaofang Jia, Hongru Jiang, Yifei Ouyang, Li Li, Jing Bai, Xiaofan Zhang, Gangqiang Ding, and Bing Zhang \*

National Institute for Nutrition and Health, Chinese Center for Disease Control and Prevention, Beijing 100050, China; sxydljk@126.com (X.S.); wanghj@ninh.chinacdc.cn (H.W.); suchang@ninh.chinacdc.cn (C.S.); wangzh@ninh.chinacdc.cn (Z.W.); Duww@ninh.chinacdc.cn (W.D.); 15732683256@163.com (H.H.); huangff@ninh.chinacdc.cn (F.H.); zhangjg@ninh.chinacdc.cn (J.Z.); jiaxf@ninh.chinacdc.cn (X.J.); jianghr@ninh.chinacdc.cn (H.J.); ouyyf@ninh.chinacdc.cn (Y.O.); lili@ninh.chinacdc.cn (L.L.); Baijing@ninh.chinacdc.cn (J.B.); Zhangxf@ninh.chinacdc.cn (X.Z.); dinggq@chinacdc.cn (G.D.)

\* Correspondence: zhangbing@chinacdc.cn, Tel.: +86-10-6623-7008, Fax: +86-10-6771-1813

**Table S1.** Comparison of characteristics between included and excluded participants, China  
Health and Nutrition Survey 1997-2018

| Baseline characteristics                                 | Excluded(n=24073)       | Included(n=4711)       | P value |
|----------------------------------------------------------|-------------------------|------------------------|---------|
| Age (year, median [IQR])                                 | 43.6(30.6,57.7)         | 42.0(33.5,50.8)        | <0.001  |
| Gender (%)                                               |                         |                        | 0.163   |
| Man                                                      | 47.6                    | 46.4                   |         |
| Woman                                                    | 52.4                    | 53.6                   |         |
| Marriage status (%)                                      |                         |                        | <0.001  |
| In marriage                                              | 76.0                    | 88.5                   |         |
| Other status                                             | 24.0                    | 11.6                   |         |
| Geographic region (%)                                    |                         |                        | <0.001  |
| Urban                                                    | 43.2                    | 27.7                   |         |
| Rural                                                    | 56.8                    | 72.3                   |         |
| Smoking (%)                                              |                         |                        | <0.001  |
| Nonsmoker                                                | 74.3                    | 69.7                   |         |
| Current smoker                                           | 25.7                    | 30.3                   |         |
| Drinking (%)                                             |                         |                        | <0.001  |
| nondrinker                                               | 65.9                    | 63.0                   |         |
| Current drinker                                          | 34.1                    | 37.0                   |         |
| Education level (%)                                      |                         |                        | <0.001  |
| Primary school                                           | 30.0                    | 52.8                   |         |
| Middle school                                            | 33.4                    | 30.6                   |         |
| High school and above                                    | 36.6                    | 16.7                   |         |
| Physical activity (%)                                    |                         |                        | 0.043   |
| Low                                                      | 95.2                    | 95.6                   |         |
| Medium                                                   | 3.5                     | 3.5                    |         |
| High                                                     | 1.3                     | 0.9                    |         |
| Chronic disease history (%)                              |                         |                        | <0.001  |
| No                                                       | 88.5                    | 96.9                   |         |
| Yes                                                      | 11.5                    | 3.1                    |         |
| Per capita household income<br>(yuan/year, median [IQR]) | 21329.6(8784.0,53462.6) | 8900.8(4997.3,14309.9) | <0.001  |
| Urbanicity score (median [IQR])                          | 71.3 (51.4,85.7)        | 51.0 (36.8,69.2)       | <0.001  |
| BMI (mg/kg <sup>2</sup> , mean [SD])                     | 23.48(3.8)              | 22.3 (2.9)             | <0.001  |
| WC (cm, mean [SD])                                       | 81.4(11.2)              | 77.3(8.9)              | 0.134   |
| SBP (mmHg, mean [SD])                                    | 122.1(18.2)             | 117.1(15.8)            | <0.001  |
| DBP (mmHg, mean [SD])                                    | 78.6(11.0)              | 76.3(10.4)             | 0.453   |

## Supplemental file 3

Submitted to **European Journal of Nutrition**

### **Trajectories of energy intake distribution and subsequent risk of hyperglycemia among Chinese adults: Findings from the China Health and Nutrition Survey (1997-2018)**

Xiaoyun Song, Huijun Wang, Chang Su, Zhihong Wang, Wenwen Du, Haojie Hu, Feifei Huang, Jiguo Zhang, Xiaofang Jia, Hongru Jiang, Yifei Ouyang, Li Li, Jing Bai, Xiaofan Zhang, Gangqiang Ding, and Bing Zhang \*

National Institute for Nutrition and Health, Chinese Center for Disease Control and Prevention, Beijing 100050, China; [sxydljk@126.com](mailto:sxydljk@126.com) (X.S.); [wanghj@ninh.chinacdc.cn](mailto:wanghj@ninh.chinacdc.cn) (H.W.); [suchang@ninh.chinacdc.cn](mailto:suchang@ninh.chinacdc.cn) (C.S.); [wangzh@ninh.chinacdc.cn](mailto:wangzh@ninh.chinacdc.cn) (Z.W.); [Duww@ninh.chinacdc.cn](mailto:Duww@ninh.chinacdc.cn) (W.D.); [15732683256@163.com](mailto:15732683256@163.com) (H.H.); [huangff@ninh.chinacdc.cn](mailto:huangff@ninh.chinacdc.cn) (F.H.); [zhangjg@ninh.chinacdc.cn](mailto:zhangjg@ninh.chinacdc.cn) (J.Z.); [jiaxf@ninh.chinacdc.cn](mailto:jiaxf@ninh.chinacdc.cn) (X.J.); [jianghr@ninh.chinacdc.cn](mailto:jianghr@ninh.chinacdc.cn) (H.J.); [ouyyf@ninh.chinacdc.cn](mailto:ouyyf@ninh.chinacdc.cn) (Y.O.); [lili@ninh.chinacdc.cn](mailto:lili@ninh.chinacdc.cn) (L.L.); [Baijing@ninh.chinacdc.cn](mailto:Baijing@ninh.chinacdc.cn) (J.B.); [Zhangxf@ninh.chinacdc.cn](mailto:Zhangxf@ninh.chinacdc.cn) (X.Z.); [dinggq@chinacdc.cn](mailto:dinggq@chinacdc.cn) (G.D.)

\* Correspondence: [zhangbing@chinacdc.cn](mailto:zhangbing@chinacdc.cn), Tel.: +86-10-6623-7008, Fax: +86-10-6771-1813

**Table S2.** Parameters of model-adequacy criteria of the multi-trajectory model

| Trajectory group number   | 2ΔBIC          | APPA        | OCC                           | Entropy      | Proportion of individuals in groups (%) |
|---------------------------|----------------|-------------|-------------------------------|--------------|-----------------------------------------|
| All participants (n=4711) |                |             |                               |              |                                         |
| 1                         | NA             | 1           | NA                            | NA           | 100.0                                   |
| 2                         | 5074.6         | 0.92        | 9.9/14.1                      | 0.738        | 58.8/41.2                               |
| 3                         | 4831.8         | 0.93        | 11.2/15.3/1692.5              | 0.846        | 57.9/39.7/2.4                           |
| 4                         | <b>2289.6</b>  | <b>0.92</b> | <b>11.3/17.52/73.5/2008.4</b> | <b>0.851</b> | <b>54.6/32.6/11.0/1.8</b>               |
| 5                         | 1070.6         | 0.90        | 12.0/12.2/79.8/274.3/1670.2   | 0.847        | 47.4/36.9/10.7/3.3/1.8                  |
| Males (n=2188)            |                |             |                               |              |                                         |
| 1                         | NA             | 1           | NA                            | NA           | 100.0                                   |
| 2                         | 2258.1         | 0.92        | 10.4/12.4                     | 0.728        | 55.7/44.32                              |
| 3                         | 2087.7         | 0.93        | 11.1/14.4/1806.7              | 0.840        | 55.6/41.9/2.5                           |
| 4                         | <b>1057.5</b>  | <b>0.92</b> | <b>12.3/15.9/75.7/7423.8</b>  | <b>0.849</b> | <b>51.2/35.5/11.6/1.6</b>               |
| 5                         | No convergence |             |                               |              |                                         |
| Females (n=2523)          |                |             |                               |              |                                         |
| 1                         | NA             | 1           | NA                            | NA           | 100.0                                   |
| 2                         | 2691.0         | 0.93        | 9.9/15.2                      | 0.747        | 61.1/38.9                               |
| 3                         | 2646.7         | 0.93        | 11.2/2828.1/16.5              | 0.852        | 59.8/2.3/37.9                           |
| 4                         | <b>1137.8</b>  | <b>0.92</b> | <b>73.4/10.6/18.9/6493.5</b>  | <b>0.854</b> | <b>10.7/57.1/30.4/1.8</b>               |
| 5                         | 585.0          | 0.90        | 2772.1/60.1/10.3/18.6/89.9    | 0.843        | 1.9/7.8/50.5/30.8/9.0                   |

2ΔBIC, ≈ the logged Bayes factor, > 10 was considered as a reasonable standard for strong evidence in favor of the complex model ); APPA, average posterior probability of assignment, > 0.70 was indicative of a good model fit; OCC, odds of correct classification, > 5 for all groups was indicative of a good model fit; Entropy, >0.80 was indicative of better classification; Proportion of individuals in group, ≥ 1% for each group was accepted.

## Supplemental file 4

Submitted to **European Journal of Nutrition**

### **Trajectories of energy intake distribution and subsequent risk of hyperglycemia among Chinese adults: Findings from the China Health and Nutrition Survey (1997-2018)**

Xiaoyun Song, Huijun Wang, Chang Su, Zhihong Wang, Wenwen Du, Haojie Hu, Feifei Huang, Jiguo Zhang, Xiaofang Jia, Hongru Jiang, Yifei Ouyang, Li Li, Jing Bai, Xiaofan Zhang, Gangqiang Ding, and Bing Zhang \*

National Institute for Nutrition and Health, Chinese Center for Disease Control and Prevention, Beijing 100050, China; [sxydljk@126.com](mailto:sxydljk@126.com) (X.S.); [wanghj@ninh.chinacdc.cn](mailto:wanghj@ninh.chinacdc.cn) (H.W.); [suchang@ninh.chinacdc.cn](mailto:suchang@ninh.chinacdc.cn) (C.S.); [wangzh@ninh.chinacdc.cn](mailto:wangzh@ninh.chinacdc.cn) (Z.W.); [Duww@ninh.chinacdc.cn](mailto:Duww@ninh.chinacdc.cn) (W.D.); [15732683256@163.com](mailto:15732683256@163.com) (H.H.); [huangff@ninh.chinacdc.cn](mailto:huangff@ninh.chinacdc.cn) (F.H.); [zhangjg@ninh.chinacdc.cn](mailto:zhangjg@ninh.chinacdc.cn) (J.Z.); [jiaxf@ninh.chinacdc.cn](mailto:jiaxf@ninh.chinacdc.cn) (X.J.); [jianghr@ninh.chinacdc.cn](mailto:jianghr@ninh.chinacdc.cn) (H.J.); [ouyyf@ninh.chinacdc.cn](mailto:ouyyf@ninh.chinacdc.cn) (Y.O.); [lili@ninh.chinacdc.cn](mailto:lili@ninh.chinacdc.cn) (L.L.); [Baijing@ninh.chinacdc.cn](mailto:Baijing@ninh.chinacdc.cn) (J.B.); [Zhangxf@ninh.chinacdc.cn](mailto:Zhangxf@ninh.chinacdc.cn) (X.Z.); [dinggq@chinacdc.cn](mailto:dinggq@chinacdc.cn) (G.D.)

\* Correspondence: [zhangbing@chinacdc.cn](mailto:zhangbing@chinacdc.cn), Tel.: +86-10-6623-7008, Fax: +86-10-6771-1813

(a) Male<sup>♂</sup>

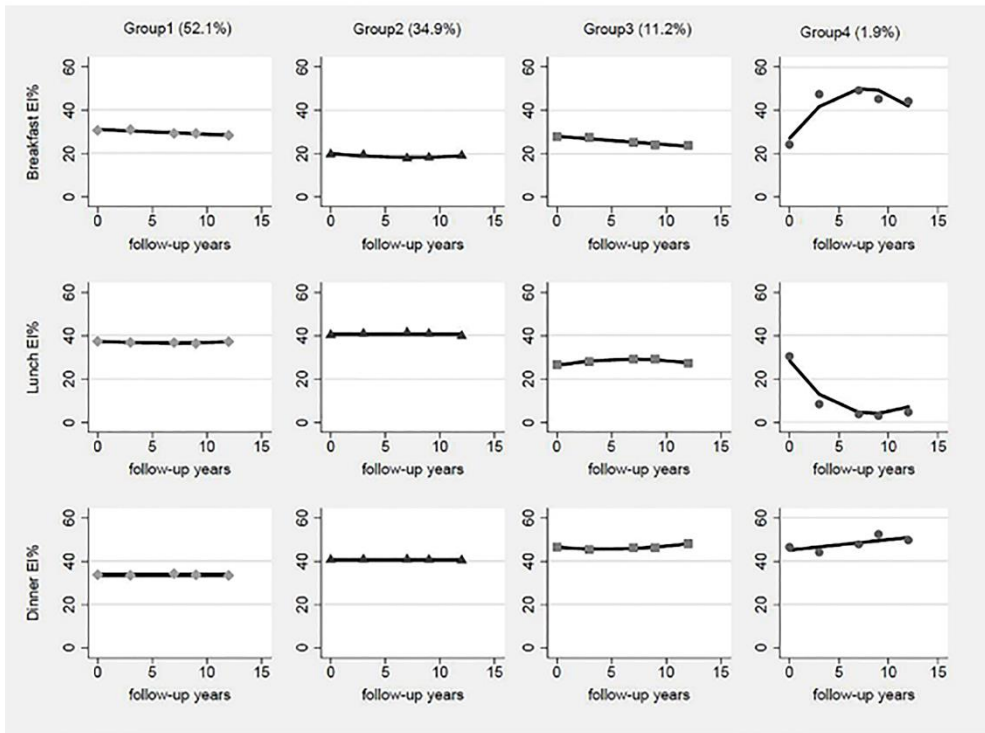

(b) Female<sup>♀</sup>

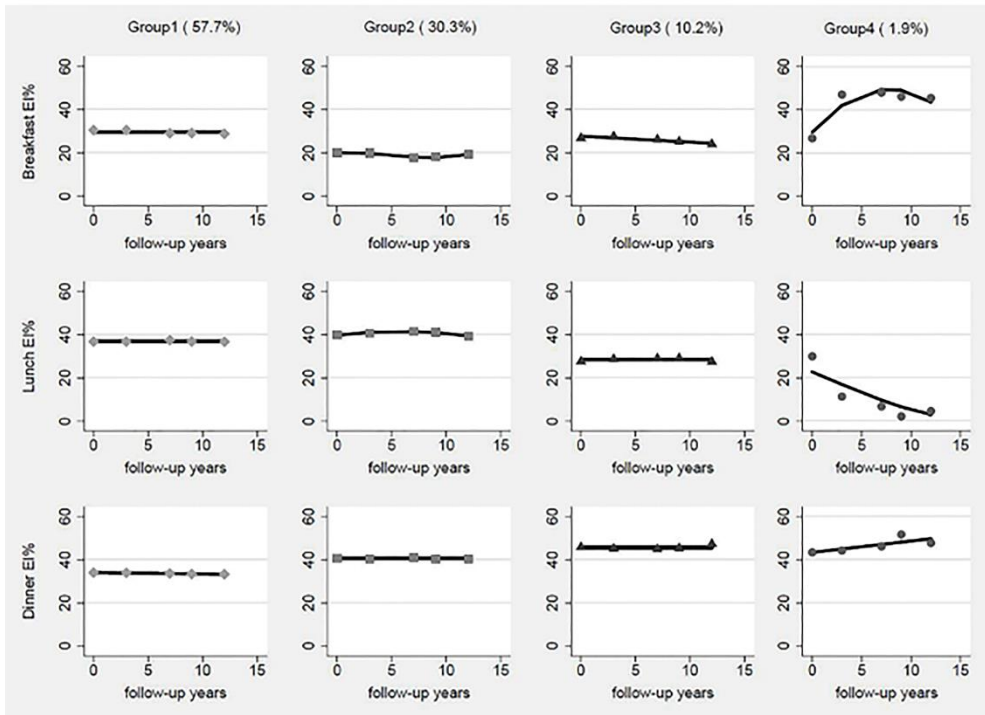

**Figure S2.** Estimated trajectory groups of energy intake distribution among (A) male participants and (B) female participants.

Group 1, labelled “Energy evenly distributed with steady trend group”; Group 2, labelled “Dinner and lunch energy dominant with relatively steady trend group”; Group 3, labelled “Dinner energy dominant with increasing trend and breakfast energy with declining trend group”; Group 4, labelled “breakfast and dinner energy dominant with increasing trend group”.



## Supplemental file 5

Submitted to **European Journal of Nutrition**

### **Trajectories of energy intake distribution and subsequent risk of hyperglycemia among Chinese adults: Findings from the China Health and Nutrition Survey (1997-2018)**

Xiaoyun Song, Huijun Wang, Chang Su, Zhihong Wang, Wenwen Du, Haojie Hu, Feifei Huang, Jiguo Zhang, Xiaofang Jia, Hongru Jiang, Yifei Ouyang, Li Li, Jing Bai, Xiaofan Zhang, Gangqiang Ding, and Bing Zhang \*

National Institute for Nutrition and Health, Chinese Center for Disease Control and Prevention, Beijing 100050, China; [sxydljk@126.com](mailto:sxydljk@126.com) (X.S.); [wanghj@ninh.chinacdc.cn](mailto:wanghj@ninh.chinacdc.cn) (H.W.); [suchang@ninh.chinacdc.cn](mailto:suchang@ninh.chinacdc.cn) (C.S.); [wangzh@ninh.chinacdc.cn](mailto:wangzh@ninh.chinacdc.cn) (Z.W.); [Duww@ninh.chinacdc.cn](mailto:Duww@ninh.chinacdc.cn) (W.D.); [15732683256@163.com](mailto:15732683256@163.com) (H.H.); [huangff@ninh.chinacdc.cn](mailto:huangff@ninh.chinacdc.cn) (F.H.); [zhangjg@ninh.chinacdc.cn](mailto:zhangjg@ninh.chinacdc.cn) (J.Z.); [jiaxf@ninh.chinacdc.cn](mailto:jiaxf@ninh.chinacdc.cn) (X.J.); [jianghr@ninh.chinacdc.cn](mailto:jianghr@ninh.chinacdc.cn) (H.J.); [ouyyf@ninh.chinacdc.cn](mailto:ouyyf@ninh.chinacdc.cn) (Y.O.); [lili@ninh.chinacdc.cn](mailto:lili@ninh.chinacdc.cn) (L.L.); [Baijing@ninh.chinacdc.cn](mailto:Baijing@ninh.chinacdc.cn) (J.B.); [Zhangxf@ninh.chinacdc.cn](mailto:Zhangxf@ninh.chinacdc.cn) (X.Z.); [dinggq@chinacdc.cn](mailto:dinggq@chinacdc.cn) (G.D.)

\* Correspondence: [zhangbing@chinacdc.cn](mailto:zhangbing@chinacdc.cn), Tel.: +86-10-6623-7008, Fax: +86-10-6771-1813

**Table S4.** 9-year longitudinal analysis of effect of trajectory groups on the relative risk (RR) of hyperglycemia by type of outcome in all participants (n=4711) <sup>1</sup>

|                                           | Group 1 (n=2614)    | Group 2 (n=1523)    | Group 3 (n=490)     | Group 4 (n=84)      |
|-------------------------------------------|---------------------|---------------------|---------------------|---------------------|
|                                           | Risk ratio (95% CI) | Risk ratio (95% CI) | Risk ratio (95% CI) | Risk ratio (95% CI) |
| <b>Incident hyperglycemia</b>             |                     |                     |                     |                     |
| Model 1                                   | 1                   | 1.05(0.90-1.21)     | 0.99(0.79-1.25)     | 0.85(0.51-1.42)     |
| Model 2                                   | 1                   | 1.00(0.85-1.17)     | 1.08(0.86-1.36)     | 0.84(0.48-1.48)     |
| Model 3                                   | 1                   | 0.99(0.84-1.15)     | 1.08(0.86-1.37)     | 0.83(0.47-1.46)     |
| Model 4                                   | 1                   | 1.10(0.94-1.29)     | 1.28(1.02-1.61) *   | 0.75(0.41-1.40)     |
| <b>Incident diabetes</b>                  |                     |                     |                     |                     |
| Model 1                                   | 1                   | 1.13(0.89-1.42)     | 1.01(0.69-1.49)     | 1.06(0.49-2.27)     |
| Model 2                                   | 1                   | 1.03(0.80-1.33)     | 1.09(0.72-1.63)     | 1.13(0.47-2.72)     |
| Model 3                                   | 1                   | 1.02(0.79-1.33)     | 1.08(0.72-1.63)     | 1.12(0.46-2.70)     |
| Model 4                                   | 1                   | 1.16(0.90-1.50)     | 1.31(0.88-1.96)     | 1.12(0.44-2.85)     |
| <b>Incident impaired fasting glycemia</b> |                     |                     |                     |                     |
| Model 1                                   | 1                   | 0.97(0.80-1.18)     | 0.99(0.74-1.33)     | 0.64(0.27-1.52)     |
| Model 2                                   | 1                   | 0.94(0.77-1.16)     | 1.11(0.82-1.49)     | 0.60(0.25-1.45)     |
| Model 3                                   | 1                   | 0.93(0.76-1.14)     | 1.11(0.83-1.50)     | 0.60(0.25-1.44)     |
| Model 4                                   | 1                   | 1.03(0.84-1.26)     | 1.28(0.94-1.73)     | 0.48(0.18-2.19)     |

<sup>1</sup> A three-level mixed-effects Poisson regression with robust (sandwich) estimation of variance, taking household as the third level, individual as the second level, and repeated measurements of individual as the first level. Model 1 adjusted for no covariates. Model 2 adjusted for age, gender (categorical), marriage status(categorical), an education level (categorical), geographic region (categorical), per capita household income, urbanicity index, physical activity (categorical), smoking (categorical), alcohol drinking (categorical), sleep duration (categorical), and chronic disease history (categorical). Model 3 additionally adjusted for total energy intake and CDGI (2019)-A score. Model 4 additionally adjusted for BMI, WC, SBP, and DBP. \* P < 0.05, \*\* P < 0.01, \*\*\*P < 0.001.

## Supplemental file 6

Submitted to **European Journal of Nutrition**

### **Trajectories of energy intake distribution and subsequent risk of hyperglycemia among Chinese adults: Findings from the China Health and Nutrition Survey (1997-2018)**

Xiaoyun Song, Huijun Wang, Chang Su, Zhihong Wang, Wenwen Du, Haojie Hu, Feifei Huang, Jiguo Zhang, Xiaofang Jia, Hongru Jiang, Yifei Ouyang, Li Li, Jing Bai, Xiaofan Zhang, Gangqiang Ding, and Bing Zhang \*

National Institute for Nutrition and Health, Chinese Center for Disease Control and Prevention, Beijing 100050, China; [sxydljk@126.com](mailto:sxydljk@126.com) (X.S.); [wanghj@ninh.chinacdc.cn](mailto:wanghj@ninh.chinacdc.cn) (H.W.); [suchang@ninh.chinacdc.cn](mailto:suchang@ninh.chinacdc.cn) (C.S.); [wangzh@ninh.chinacdc.cn](mailto:wangzh@ninh.chinacdc.cn) (Z.W.); [Duww@ninh.chinacdc.cn](mailto:Duww@ninh.chinacdc.cn) (W.D.); [15732683256@163.com](mailto:15732683256@163.com) (H.H.); [huangff@ninh.chinacdc.cn](mailto:huangff@ninh.chinacdc.cn) (F.H.); [zhangjg@ninh.chinacdc.cn](mailto:zhangjg@ninh.chinacdc.cn) (J.Z.); [jiaxf@ninh.chinacdc.cn](mailto:jiaxf@ninh.chinacdc.cn) (X.J.); [jianghr@ninh.chinacdc.cn](mailto:jianghr@ninh.chinacdc.cn) (H.J.); [ouyyf@ninh.chinacdc.cn](mailto:ouyyf@ninh.chinacdc.cn) (Y.O.); [lili@ninh.chinacdc.cn](mailto:lili@ninh.chinacdc.cn) (L.L.); [Baijing@ninh.chinacdc.cn](mailto:Baijing@ninh.chinacdc.cn) (J.B.); [Zhangxf@ninh.chinacdc.cn](mailto:Zhangxf@ninh.chinacdc.cn) (X.Z.); [dinggq@chinacdc.cn](mailto:dinggq@chinacdc.cn) (G.D.)

\* Correspondence: [zhangbing@chinacdc.cn](mailto:zhangbing@chinacdc.cn), Tel.: +86-10-6623-7008, Fax: +86-10-6771-1813

**Table S4.** 9-year longitudinal analysis of effect of trajectory groups on the relative risk (RR) of hyperglycemia by type of outcome in males and females <sup>1</sup>

|                                    | Group 1             | Group 2             | Group 3             | Group 4             |
|------------------------------------|---------------------|---------------------|---------------------|---------------------|
|                                    | Risk ratio (95% CI) | Risk ratio (95% CI) | Risk ratio (95% CI) | Risk ratio (95% CI) |
| Males(n=2188)                      | n=1139              | n=764               | n=244               | n=41                |
| Incident hyperglycemia             |                     |                     |                     |                     |
| Model 1                            | 1                   | 0.97(0.80-1.18)     | 1.07(0.81-1.42)     | 0.60(0.26-1.39)     |
| Model 2                            | 1                   | 0.92(0.75-1.14)     | 1.26(0.94-1.69)     | 0.61(0.25-1.46)     |
| Model 3                            | 1                   | 0.92(0.74-1.14)     | 1.27(0.95-1.70)     | 0.60(0.25-1.44)     |
| Model 4                            | 1                   | 1.07(0.87-1.33)     | 1.44(1.07-1.94) *   | 0.53(0.20-1.41)     |
| Incident diabetes                  |                     |                     |                     |                     |
| Model 1                            | 1                   | 1.11(0.81-1.53)     | 1.15(0.72-1.81)     | 1.05(0.38-2.94)     |
| Model 2                            | 1                   | 0.99(0.69-1.41)     | 1.38(0.82-2.31)     | 1.21(0.36-4.04)     |
| Model 3                            | 1                   | 1.00(0.70-1.42)     | 1.37(0.82-2.30)     | 1.20(0.36-3.97)     |
| Model 4                            | 1                   | 1.17(0.82-1.67)     | 1.58(0.95-2.65)     | 1.14(0.33-3.93)     |
| Incident impaired fasting glycemia |                     |                     |                     |                     |
| Model 1                            | 1                   | 0.84(0.64-1.10)     | 1.02(0.70-1.49)     | 0.19(0.03-1.31)     |
| Model 2                            | 1                   | 0.85(0.64-1.13)     | 1.20(0.82-1.76)     | 0.19(0.03-1.21)     |
| Model 3                            | 1                   | 0.84(0.63-1.11)     | 1.21(0.83-1.78)     | 0.19(0.03-1.21)     |
| Model 4                            | 1                   | 0.97(0.73-1.29)     | 1.35(0.91-2.00)     | 0.11(0.01-1.97)     |
| Females(n=2533)                    | n=1455              | n=764               | n=257               | n=47                |
| Incident hyperglycemia             |                     |                     |                     |                     |
| Model 1                            | 1                   | 1.12(0.91-1.38)     | 0.91(0.65-1.26)     | 1.15(0.59-2.23)     |
| Model 2                            | 1                   | 1.07(0.86-1.33)     | 0.95(0.70-1.32)     | 1.14(0.57-2.30)     |
| Model 3                            | 1                   | 1.05(0.85-1.31)     | 0.94(0.67-1.32)     | 1.12(0.55-2.26)     |
| Model 4                            | 1                   | 1.12(0.91-1.40)     | 1.16(0.82-1.63)     | 1.04(0.50-2.16)     |
| Incident diabetes                  |                     |                     |                     |                     |
| Model 1                            | 1                   | 1.11(0.79-1.56)     | 0.82(0.47-1.43)     | 0.94(0.28-3.15)     |
| Model 2                            | 1                   | 1.05(0.73-1.51)     | 0.82(0.45-1.49)     | 1.00(0.27-3.70)     |
| Model 3                            | 1                   | 1.03(0.71-1.49)     | 0.81(0.45-1.48)     | 0.99(0.26-3.72)     |
| Model 4                            | 1                   | 1.11(0.77-1.60)     | 1.04(0.57-1.88)     | 1.05(0.27-4.03)     |
| Incident impaired fasting glycemia |                     |                     |                     |                     |
| Model 1                            | 1                   | 1.11(0.84-1.47)     | 0.96(0.63-1.47)     | 1.31(0.55-3.15)     |
| Model 2                            | 1                   | 1.04(0.78-1.39)     | 1.04(0.68-1.59)     | 1.23(0.51-2.98)     |
| Model 3                            | 1                   | 1.03(0.78-1.38)     | 1.04(0.68-1.60)     | 1.20(0.49-2.90)     |
| Model 4                            | 1                   | 1.09(0.82-1.46)     | 1.22(0.79-1.89)     | 0.97(0.39-2.45)     |

<sup>1</sup> A three-level mixed-effects Poisson regression with robust (sandwich) estimation of variance, taking household as the third level, individual as the second level, and repeated measurements of individual as

the first level. Model 1 adjusted for no covariates. Model 2 adjusted for age, marriage status(categorical), an education level (categorical), geographic region (categorical), per capita household income, urbanicity index, physical activity (categorical), smoking (categorical), alcohol drinking (categorical), sleep duration (categorical), and chronic disease history (categorical). Model 3 additionally adjusted for total energy intake and CDGI (2019)-A score. Model 4 additionally adjusted for BMI, WC, SBP, and DBP. \*  $P < 0.05$ , \*\*  $P < 0.01$ , \*\*\* $P < 0.001$ .

## Supplemental file 7

Submitted to **European Journal of Nutrition**

### **Trajectories of energy intake distribution and subsequent risk of hyperglycemia among Chinese adults: Findings from the China Health and Nutrition Survey (1997-2018)**

Xiaoyun Song, Huijun Wang, Chang Su, Zhihong Wang, Wenwen Du, Haojie Hu, Feifei Huang, Jiguo Zhang, Xiaofang Jia, Hongru Jiang, Yifei Ouyang, Li Li, Jing Bai, Xiaofan Zhang, Gangqiang Ding, and Bing Zhang \*

National Institute for Nutrition and Health, Chinese Center for Disease Control and Prevention, Beijing 100050, China; [sxydljk@126.com](mailto:sxydljk@126.com) (X.S.); [wanghj@ninh.chinacdc.cn](mailto:wanghj@ninh.chinacdc.cn) (H.W.); [suchang@ninh.chinacdc.cn](mailto:suchang@ninh.chinacdc.cn) (C.S.); [wangzh@ninh.chinacdc.cn](mailto:wangzh@ninh.chinacdc.cn) (Z.W.); [Duww@ninh.chinacdc.cn](mailto:Duww@ninh.chinacdc.cn) (W.D.); [15732683256@163.com](mailto:15732683256@163.com) (H.H.); [huangff@ninh.chinacdc.cn](mailto:huangff@ninh.chinacdc.cn) (F.H.); [zhangjg@ninh.chinacdc.cn](mailto:zhangjg@ninh.chinacdc.cn) (J.Z.); [jiaxf@ninh.chinacdc.cn](mailto:jiaxf@ninh.chinacdc.cn) (X.J.); [jianghr@ninh.chinacdc.cn](mailto:jianghr@ninh.chinacdc.cn) (H.J.); [ouyyf@ninh.chinacdc.cn](mailto:ouyyf@ninh.chinacdc.cn) (Y.O.); [lili@ninh.chinacdc.cn](mailto:lili@ninh.chinacdc.cn) (L.L.); [Baijing@ninh.chinacdc.cn](mailto:Baijing@ninh.chinacdc.cn) (J.B.); [Zhangxf@ninh.chinacdc.cn](mailto:Zhangxf@ninh.chinacdc.cn) (X.Z.); [dinggq@chinacdc.cn](mailto:dinggq@chinacdc.cn) (G.D.)

\* Correspondence: [zhangbing@chinacdc.cn](mailto:zhangbing@chinacdc.cn), Tel.: +86-10-6623-7008, Fax: +86-10-6771-1813

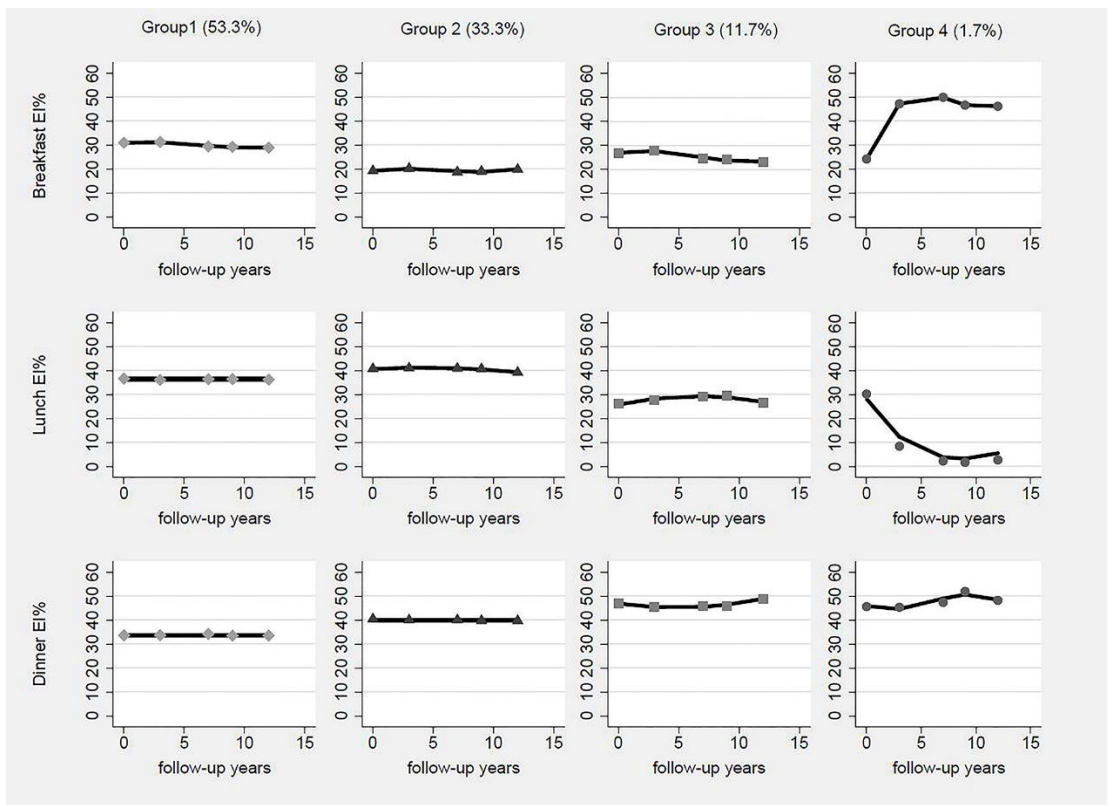

**Figure S3.** Estimated trajectory groups of energy intake distribution among Chinese adults with 3-5 rounds from 1997 to 2009 and all 4 rounds from 2009 to 2018 (n=1660)

## Supplemental file 8

Submitted to **European Journal of Nutrition**

### **Trajectories of energy intake distribution and subsequent risk of hyperglycemia among Chinese adults: Findings from the China Health and Nutrition Survey (1997-2018)**

Xiaoyun Song, Huijun Wang, Chang Su, Zhihong Wang, Wenwen Du, Haojie Hu, Feifei Huang, Jiguo Zhang, Xiaofang Jia, Hongru Jiang, Yifei Ouyang, Li Li, Jing Bai, Xiaofan Zhang, Gangqiang Ding, and Bing Zhang \*

National Institute for Nutrition and Health, Chinese Center for Disease Control and Prevention, Beijing 100050, China; [sxydljk@126.com](mailto:sxydljk@126.com) (X.S.); [wanghj@ninh.chinacdc.cn](mailto:wanghj@ninh.chinacdc.cn) (H.W.); [suchang@ninh.chinacdc.cn](mailto:suchang@ninh.chinacdc.cn) (C.S.); [wangzh@ninh.chinacdc.cn](mailto:wangzh@ninh.chinacdc.cn) (Z.W.); [Duww@ninh.chinacdc.cn](mailto:Duww@ninh.chinacdc.cn) (W.D.); [15732683256@163.com](mailto:15732683256@163.com) (H.H.); [huangff@ninh.chinacdc.cn](mailto:huangff@ninh.chinacdc.cn) (F.H.); [zhangjg@ninh.chinacdc.cn](mailto:zhangjg@ninh.chinacdc.cn) (J.Z.); [jiaxf@ninh.chinacdc.cn](mailto:jiaxf@ninh.chinacdc.cn) (X.J.); [jianghr@ninh.chinacdc.cn](mailto:jianghr@ninh.chinacdc.cn) (H.J.); [ouyyf@ninh.chinacdc.cn](mailto:ouyyf@ninh.chinacdc.cn) (Y.O.); [lili@ninh.chinacdc.cn](mailto:lili@ninh.chinacdc.cn) (L.L.); [Baijing@ninh.chinacdc.cn](mailto:Baijing@ninh.chinacdc.cn) (J.B.); [Zhangxf@ninh.chinacdc.cn](mailto:Zhangxf@ninh.chinacdc.cn) (X.Z.); [dinggq@chinacdc.cn](mailto:dinggq@chinacdc.cn) (G.D.)

\* Correspondence: [zhangbing@chinacdc.cn](mailto:zhangbing@chinacdc.cn), Tel.: +86-10-6623-7008, Fax: +86-10-6771-1813



**Table S5.** 9-year longitudinal analysis of effect of trajectory groups on the relative risk (RR) of hyperglycemia by type of outcome among participants with 3-5 rounds from 1997 to 2009 and all 4 rounds from 2009 to 2018 (n=1660) <sup>1</sup>

|                                           | Group 1 (n=884)     | Group 2(n=553)      | Group 3 (n=194)     | Group 4 (n=29)      |
|-------------------------------------------|---------------------|---------------------|---------------------|---------------------|
|                                           | Risk ratio (95% CI) | Risk ratio (95% CI) | Risk ratio (95% CI) | Risk ratio (95% CI) |
| <b>Incident hyperglycemia</b>             |                     |                     |                     |                     |
| Model 1                                   | 1                   | 1.11(0.91-1.35)     | 1.19(0.91-2.56)     | 1.37(0.79-2.40)     |
| Model 2                                   | 1                   | 1.08(0.86-1.35)     | 1.29(0.96-1.72)     | 1.45(0.74-2.83)     |
| Model 3                                   | 1                   | 1.08(0.86-1.35)     | 1.30(0.97-1.74)     | 1.44(0.74-2.81)     |
| Model 4                                   | 1                   | 1.17(0.94-1.45)     | 1.51(1.12-2.02) **  | 1.27(0.65-2.46)     |
| <b>Incident diabetes</b>                  |                     |                     |                     |                     |
| Model 1                                   | 1                   | 1.15(0.80-1.66)     | 1.25(0.76-2.07)     | 1.97(0.74-5.23)     |
| Model 2                                   | 1                   | 1.10(0.72-1.70)     | 1.42(0.78-2.56)     | 2.61(0.77-8.83)     |
| Model 3                                   | 1                   | 1.12(0.73-1.73)     | 1.43(0.79-2.58)     | 2.59(0.76-8.80)     |
| Model 4                                   | 1                   | 1.22(0.81-1.85)     | 1.66(0.93-2.96)     | 2.43(0.72-8.17)     |
| <b>Incident impaired fasting glycemia</b> |                     |                     |                     |                     |
| Model 1                                   | 1                   | 1.05(0.82-1.36)     | 1.17(0.83-1.65)     | 0.98(0.38-2.57)     |
| Model 2                                   | 1                   | 1.02(0.78-1.34)     | 1.31(0.93-1.87)     | 0.93(0.36-2.42)     |
| Model 3                                   | 1                   | 1.01(0.77-1.32)     | 1.32(0.93-1.87)     | 0.94(0.36-2.43)     |
| Model 4                                   | 1                   | 1.09(0.84-1.42)     | 1.49(1.05-2.10) *   | 0.79(0.32-1.93)     |

<sup>1</sup> A three-level mixed-effects Poisson regression with robust (sandwich) estimation of variance, taking household as the third level, individual as the second level, and repeated measurements of individual as the first level. Model 1 adjusted for no covariates. Model 2 adjusted for age, gender (categorical), marriage status(categorical), an education level (categorical), geographic region (categorical), per capita household income, urbanicity index, physical activity (categorical), smoking (categorical), alcohol drinking (categorical), sleep duration (categorical), and chronic disease history (categorical). Model 3 additionally adjusted for total energy intake and CDGI (2019)-A score. Model 4 additionally adjusted for BMI, WC, SBP, and DBP. \* P < 0.05, \*\* P < 0.01, \*\*\*P < 0.001.
